# Supplementary material for: Cytosolic Hsp70 and Hsp40 chaperones enable the biogenesis of mitochondrial β-barrel proteins
Source: PubMed Central journal article supplement — J Cell Biol. 2018 Sep 3;217(9):3091–108. doi: 10.1083/jcb.201712029 (PMC6122992; doi:10.1083/jcb.201712029), 2018-09-03
Supplement: JCB_201712029_sm.pdf [file JCB_201712029_sm.pdf]

## Supplemental material

Jores et al., <https://doi.org/10.1083/jcb.201712029>

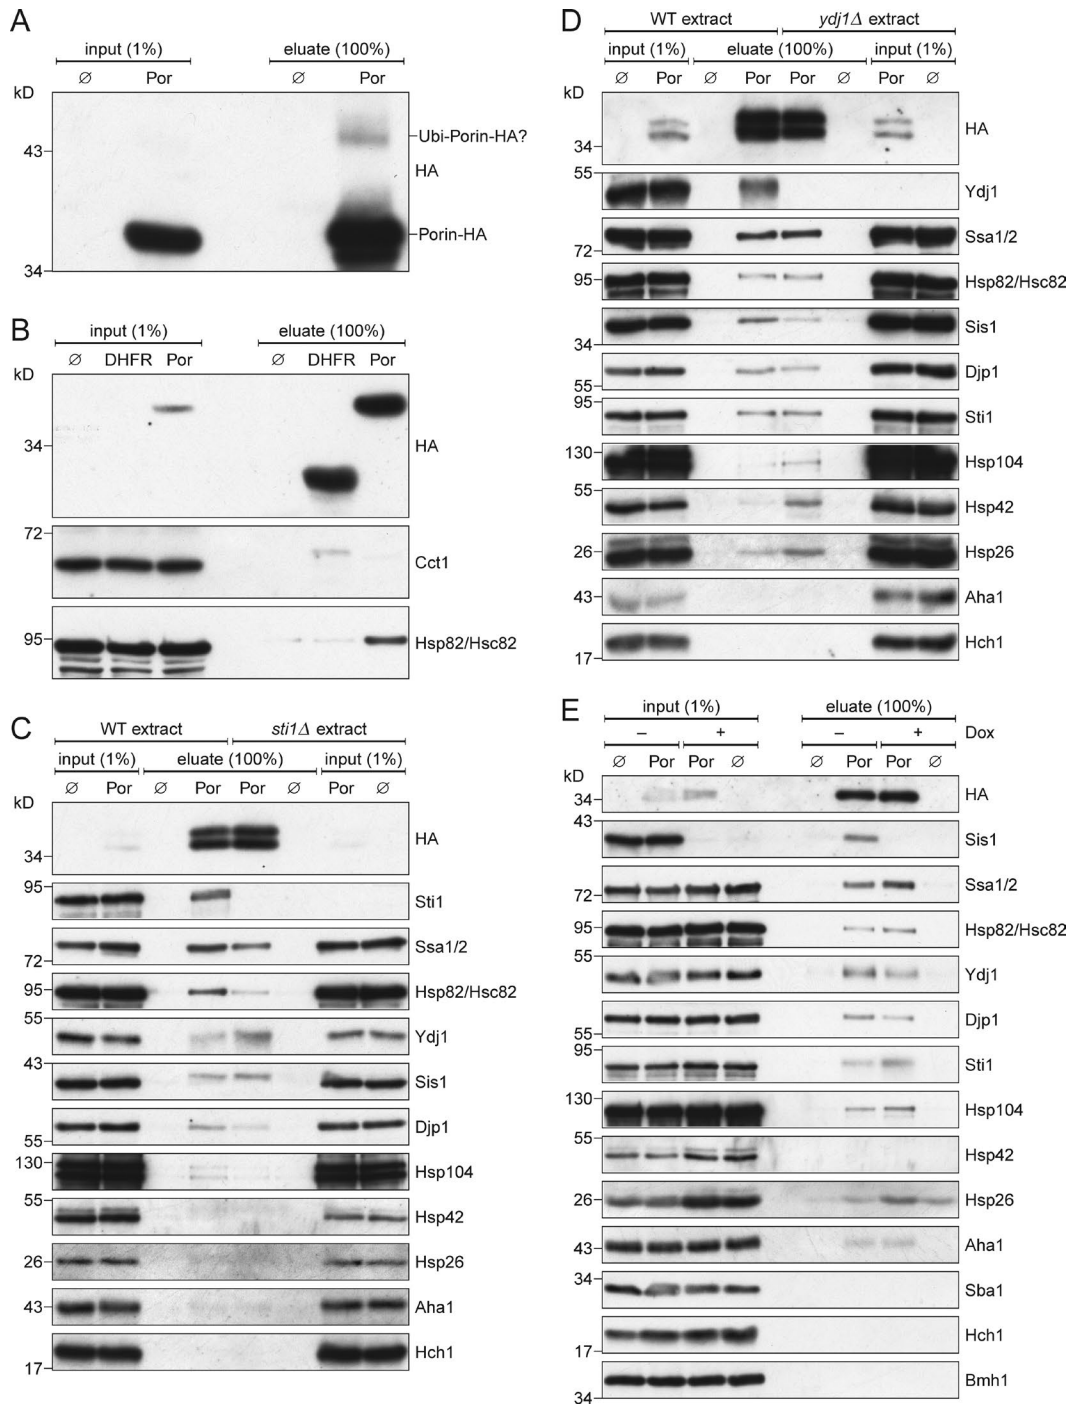

Figure S1. **The absence of a certain cochaperone affects the binding of  $\beta$ -barrel proteins to other (co)chaperones. (A and B)** In vitro translation reactions using WT yeast extracts without mRNA ( $\emptyset$ ) or programmed with mRNA encoding DHFR-3HA (DHFR) or Porin-HA (Por) were subjected to a pull-down with anti-HA beads. Samples from the input and the eluate were analyzed by SDS-PAGE and immunodecoration with the indicated antibodies. A putative ubiquitinated species of Porin-HA is indicated. **(C and D)** In vitro translation reactions using yeast extracts prepared from WT, *sti1Δ* (C), or *ydj1Δ* (D) cells without mRNA ( $\emptyset$ ) or programmed with mRNA encoding Porin-HA (Por) were subjected to a pull-down as in A. **(E)** Yeast extracts were prepared from cells that were left untreated (-Dox) or depleted for Sis1 by addition of doxycycline to the growth medium for 8 h (+Dox). The extracts were then used for in vitro translation followed by a pull-down assay as in A.

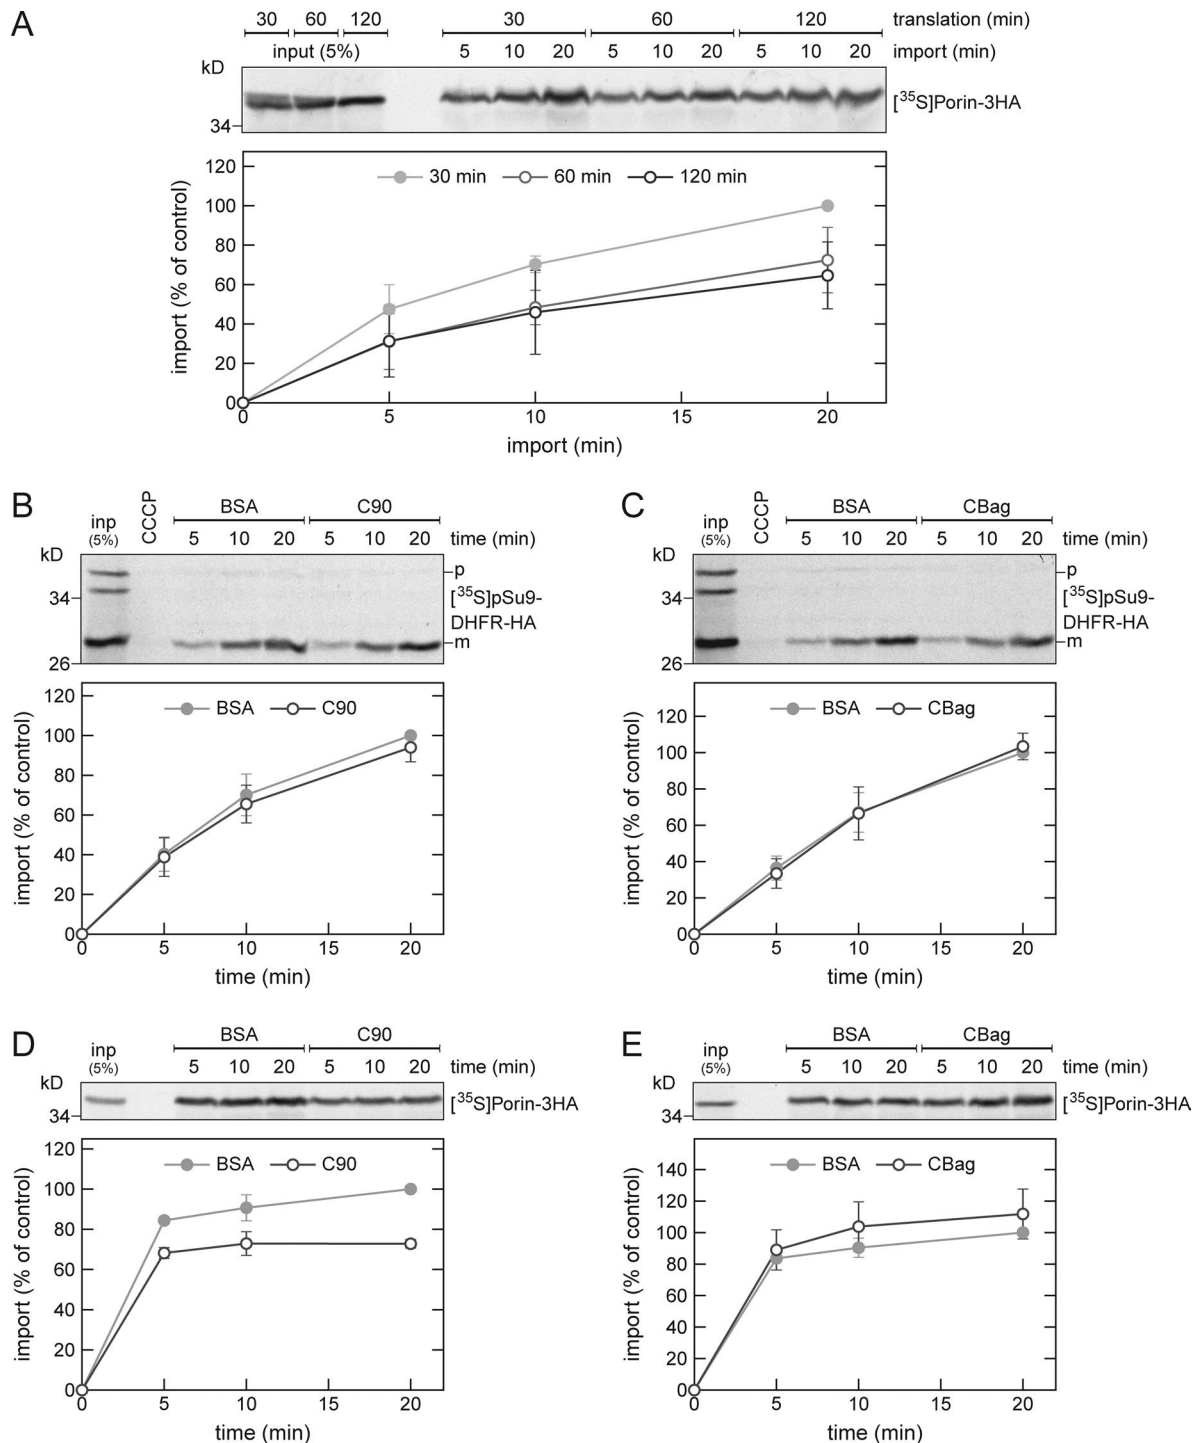

**Figure S2. The import of pSu9-DHFR-HA and urea-treated Porin-HA is not affected by chaperone inhibitors.** (A) Top, radiolabeled precursor molecules of Porin-HA were translated in yeast extract for the indicated times and were then used for in vitro import reactions using isolated mitochondria. After import for the indicated times, the mitochondria were subjected to carbonate extraction. The samples were analyzed by SDS-PAGE and autoradiography. Bottom, intensities of the bands corresponding to Porin-3HA from three independent experiments were quantified, and the mean intensity from the 20-min import of Porin-HA from the 30-min translation reaction was set to 100%. (B–E) Top, radiolabeled precursor molecules of pSu9-DHFR-HA (B and C) or urea-treated Porin-HA (D and E) were produced in yeast extract and were then subjected to in vitro import reactions using isolated mitochondria. Before the import reaction, the mitochondria were mixed with either 20  $\mu$ M C90 or an equivalent amount of BSA (B and D) or the precursor protein-containing translation reactions were supplemented with either 20  $\mu$ M CBag or an equivalent amount of BSA (C and E). After import for the indicated times, the mitochondria were treated with proteinase K (B and C) or were subjected to carbonate extraction (D and E). The samples were analyzed by SDS-PAGE and autoradiography. In a control reaction, the mitochondria were treated with the uncoupler CCCP before the import reaction (B and C). Bottom, intensities of the bands corresponding to Porin-3HA or the protease-protected, mature form (m) of pSu9-DHFR-HA from three independent experiments were quantified and the mean intensity from the 20 min import with BSA was set to 100%. Error bars represent  $\pm$  SD. p and m, precursor and mature forms of pSu9-DHFR-HA, respectively.

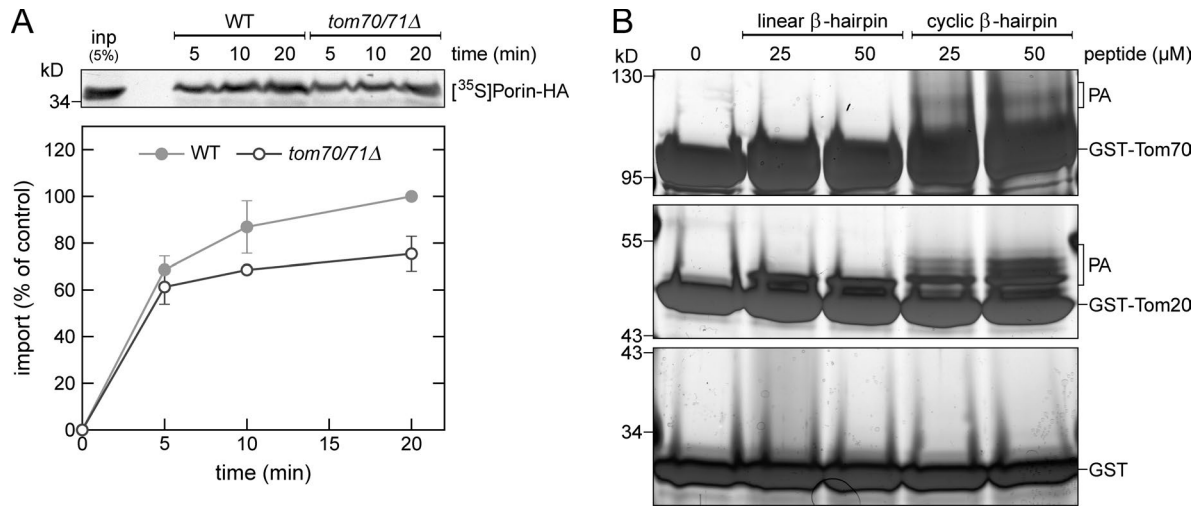

Figure S3. **The import receptor Tom70 is involved in the biogenesis of  $\beta$ -barrel proteins.** (A) Top, radiolabeled precursor molecules of Porin-HA were produced in yeast extract and subjected to in vitro import reactions using mitochondria isolated from a WT or a *tom70/71Δ* double deletion strain. After import for the indicated times, the mitochondria were subjected to carbonate extraction and analyzed by SDS-PAGE and autoradiography. Bottom, the intensities of the bands corresponding to Porin-3HA from three independent experiments were quantified, and the mean intensity from the 20-min import with WT mitochondria was set to 100%. Error bars represent  $\pm$ SD. (B) The recombinant proteins GST-Tom70 (top), GST-Tom20 (middle), and GST (bottom) were incubated with a Bpa-containing linear or cyclic  $\beta$ -hairpin peptide at the indicated concentrations. The samples were illuminated with UV light before analysis by SDS-PAGE and silver staining. PAs are indicated.

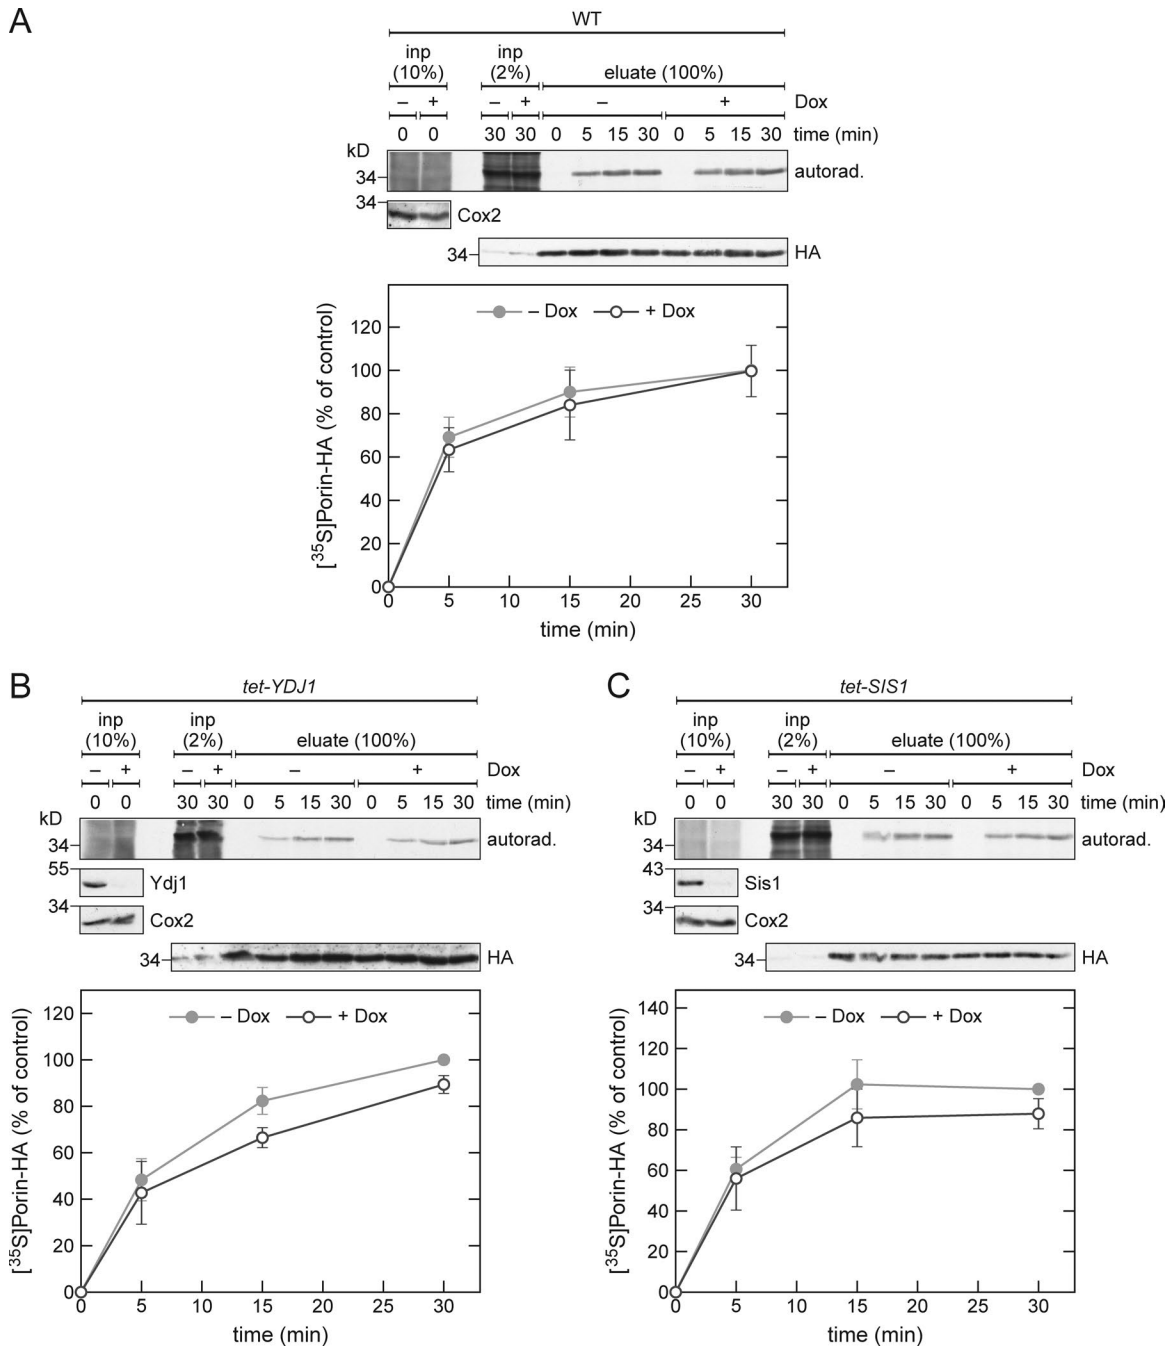

Figure S4. **The biogenesis of Porin-HA is not affected by doxycycline and only mildly reduced in the absence of Ydj1 or Sis1.** (A–C) Top, yeast cells harboring endogenously HA-tagged Porin from a WT strain (A) or from strains with a tetracycline-repressible promoter controlling the expression of *YDJ1* (B) or *SIS1* (C) were grown for 4 h in the absence (–Dox) or presence (+Dox) of doxycycline followed by 1 h of methionine starvation. Synthesis of radio-labeled proteins was initiated by addition of [<sup>35</sup>S]Met to the medium, and cells were harvested after the indicated time periods. Then, a crude mitochondrial fraction was obtained, solubilized, and subjected to a pull-down with anti-HA beads. Input samples from the whole cell lysate (inp), and the eluates were analyzed by SDS-PAGE, autoradiography (autorad.), and immunodecoration with the indicated antibodies. Cox2 was used as a loading control. Bottom, intensities of the bands corresponding to Porin-HA from three independent experiments were quantified and the mean intensity from the 30-min samples without doxycycline was set to 100%. Error bars represent ±SD.

Table S1. **Yeast strains used in this study.**

| Strain                                                   | Genotype                                                                                                                                                 | Reference                             |
|----------------------------------------------------------|----------------------------------------------------------------------------------------------------------------------------------------------------------|---------------------------------------|
| <b><i>sti1Δ</i></b>                                      | W303α, <i>sti1Δ::HIS3MX6</i>                                                                                                                             | <a href="#">Hoseini et al. (2016)</a> |
| <b><i>ydj1Δ</i></b>                                      | BY4741, <i>ydj1Δ::KanMX4</i>                                                                                                                             | EUROSCARF                             |
| <b><i>tom70/71Δ</i></b>                                  | W303α, <i>tom70Δ::KanMX4</i> , <i>tom71Δ::NatNT2</i>                                                                                                     | This study                            |
| <b><i>tetO<sub>7</sub>-Sis1</i></b>                      | YMK120a, <i>sis1::tetO<sub>7</sub>-SIS1 NatMX</i>                                                                                                        | This study                            |
| <b><i>tetO<sub>7</sub>-Ydj1/Sis1</i></b>                 | YMK120a, <i>sis1::tetO<sub>7</sub>-SIS1 NatMX</i> , <i>ydj1::tetO<sub>7</sub>-YDJ1 KanMX</i>                                                             | This study                            |
| <b>Porin-3HA <i>tetO<sub>7</sub>-Ubi-L-Ydj1</i></b>      | YMK120a, <i>por1::POR1-3HA NatNT2</i> , <i>ydj1::tetO<sub>7</sub>-Ubiquitin-Leu-YDJ1 HIS3MX</i>                                                          | This study                            |
| <b>Porin-3HA <i>tetO<sub>7</sub>-Ubi-L-Sis1</i></b>      | YMK120a, <i>por1::POR1-3HA NatNT2</i> , <i>sis1::tetO<sub>7</sub>-Ubiquitin-Leu-SIS1 HIS3MX</i>                                                          | This study                            |
| <b>Porin-3HA <i>tetO<sub>7</sub>-Ubi-L-Ydj1/Sis1</i></b> | YMK120a, <i>por1::POR1-3HA NatNT2</i> , <i>ydj1::tetO<sub>7</sub>-Ubiquitin-Leu-YDJ1 HIS3MX</i> , <i>sis1::tetO<sub>7</sub>-Ubiquitin-Leu-SIS1 KanMX</i> | This study                            |

Table S2. Primers used in this study

| Construct                          | Primer | Sequence (5'-3')                                                            |
|------------------------------------|--------|-----------------------------------------------------------------------------|
| <b>Porin-3HA</b>                   | TJ207  | AGTTGTCTGAACCTGTTCAAGCTAGTTGGTCTTTGTCCCTCGACGCTCTGAAGCTTTACCCATACGATGTTCTCG |
|                                    | TJ208  | CGAGCACATATATGGTATATAGTGAACATATATATATAGATATATACGTGAGCTCGATTACAACAGGTGTTGTCC |
| <b>tetO<sub>7</sub>-Sis1</b>       | TJ196  | GGATAAGTTGTTGCATTTTAAGATTTTTTTTTTAATACATTACATCAACAGTATAGCGACCAGCATTACATACG  |
|                                    | TJ198  | GCACTTGGAGATACTCCAAGTAAATCATAAAGTTTTGTCTCCTTGACCATAAGCTTATCGATACCGTCGATCCCC |
| <b>tetO<sub>7</sub>-Ydj1</b>       | TJ192  | CATATCTTTTGATAGAACATAAATAAAAATATCCAAACTGAATTCTACACAGTATAGCGACCAGCATTACATACG |
|                                    | TJ194  | GCAGTTACTGGAACACCTAGAATATCGTAAACTTAGTTTTCTTTAACATAAGCTTATCGATACCGTCGATCCCC  |
| <b>tetO<sub>7</sub>-Ubi-L-Ydj1</b> | TJ192  | CATATCTTTTGATAGAACATAAATAAAAATATCCAAACTGAATTCTACACAGTATAGCGACCAGCATTACATACG |
|                                    | TJ193  | GTGGCAGTTACTGGAACACCTAGAATATCGTAAACTTAGTTTTCTTTAACCAAACCTCTCAATCTCAAGACCAAG |
| <b>tetO<sub>7</sub>-Ubi-L-Sis1</b> | TJ196  | GGATAAGTTGTTGCATTTTAAGATTTTTTTTTTAATACATTACATCAACAGTATAGCGACCAGCATTACATACG  |
|                                    | TJ197  | TTAGCACTTGGAGATACTCCAAGTAAATCATAAAGTTTTGTCTCCTTGACCAAACCTCTCAATCTCAAGACCAAG |
| <b>tom70Δ</b>                      | TJ326  | GCAAGATTCGGAAGTAAATACAGCTCACATCTAGGTTCTCAATTGCCAGACATGGAGGCCAGAATACCTCC     |
|                                    | TJ327  | TTACTTAGTTTTGTCTTCTCCTAAAAGTTTTAAGTTTATGTTACTGTGTCAGTATAGCGACCAGCATTACATAC  |
| <b>tom71Δ</b>                      | TJ292  | TTTTGTATATCTCTACATACTTGATATATACCGAACATAAGAAGCTCTTGCCAGATCTGTTTAGCTTGCCCTCG  |
|                                    | TJ293  | TATCCAGTATTAATAAAAGTATATATTTGACCAATACCTGACATATCTTGAGCTCGATTACAACAGGTGTTGTCC |
| <b>pGEM4polyA</b>                  | TJ154  | AAAAAAAAAAAAAAAAAAAAAAAAAAAAAAAAAAGCGCCGCCCGGTCTCCCTATAGTGAGTCGTATTAATTC    |
|                                    | TJ155  | TTTTTTTTTTTTTTTTTTTTTTTTTTTTTTTTTAAGCTTGCATGCCTGCAGGTCGACTC                 |
| <b>3HA</b>                         | TJ024  | CCC-GGATCCATACCCATACGATGTTCC                                                |
|                                    | TJ025  | CCC-GTCGACTTAACCAGCGTAATCTGG                                                |
| <b>DHFR-3HA</b>                    | TJ009  | CCC-GGTACCATGGTTTCGACCATTGAACTGC                                            |
|                                    | TJ010  | CCC-GGATCCCCGTCTTTCTTCTCGTAGAC                                              |
| <b>yk DHFR-3HA</b>                 | TJ144  | CACAC-GGTACCAAAAAAATGTCTGTTTCGACCATTGAACTGCATC                              |
|                                    | TJ010  | CCC-GGATCCCCGTCTTTCTTCTCGTAGAC                                              |
| <b>yk Porin-3HA</b>                | TJ149  | CACAC-GGTACCAAAAAAATGTCTCCTCCAGTTTACAGC                                     |
|                                    | TJ150  | CACACGGATCCCCAGCGTGAAGGACAAAGAC                                             |
| <b>yk Tom40-3HA</b>                | TJ180  | CACACGAGCTCAAAAAAATGTCTGCACCAACTCCATTAGC                                    |
|                                    | TJ181  | CACACGGATCCCCAATTGAGGAAGAGCTTGCAATG                                         |
| <b>yk Tob55(bbd)-3HA</b>           | TJ184  | CACACGAGCTCAAAAAAATGTCTAAAACGTTTACAGCGAAGACAG                               |
|                                    | TJ183  | CACACGGATCCCCAAAAATGCCAGACCAAGACCAAAC                                       |
| <b>yk NcTom40</b>                  | TJ187  | CACACGAGCTCAAAAAAATGGCTTCGTTTTCCACCG                                        |
|                                    | TJ188  | CACACGGATCCTTAAAAGGGGATGTTGAGGGAC                                           |
| <b>yk Tom40</b>                    | TJ180  | CACACGAGCTCAAAAAAATGTCTGCACCAACTCCATTAGC                                    |
|                                    | TJ186  | CACACGGATCCTTACAATTGAGGAAGAGCTTGCAATG                                       |
| <b>yk Om14</b>                     | TJ300  | CACACGAGCTCAAAAAAATGTCTGCAACTGCTAAACAC                                      |
|                                    | TJ301  | CACACGGATCCCCCTTTCTTGTCTATCTGGAGTAG                                         |
| <b>yk Cyc3</b>                     | TJ312  | CACACGAGCTCAAAAAAATGGGTTGGTTTTGGGCAG                                        |
|                                    | TJ313  | CACACGGATCCCCAGGGCGGAGGACGAAG                                               |
| <b>yk Tim23</b>                    | TJ302  | CACACGAGCTCAAAAAAATGTCTGGGCTTTTTGGAG                                        |
|                                    | TJ303  | CACACGGATCCCCTTTTCAAGTAGTCTTTTCTTGACAC                                      |
| <b>yk Yah1</b>                     | TJ314  | CACACGAGCTCAAAAAAATGCTGAAAATTGTTACTCGGG                                     |
|                                    | TJ315  | CACACGGATCCCCACTAAAATCGTTGTTATTAACGTTTTC                                    |
| <b>yk pSu9-DHFR-3HA</b>            | TJ157  | CACACGAATTCAAAAAAATGTCTGCCTCCACTCGTGCTCC                                    |
|                                    | TJ158  | CACACGGTACCACCAGCACCAGCACCAGGAGTAGGCGCGC                                    |
| <b>hp18(VDAC, Bpa258)</b>          | TJ090  | GGTATTAACCTGTAGCTGTCAGCTCTTC                                                |
|                                    | TJ091  | GAAGAGCTGACAGCTACAGTTAATACC                                                 |
| <b>hp18(VDAC)-DHFR-3HA</b>         | TJ014  | CCCGAATTCATGAAGCCAGGTATTAACCTGAC                                            |

Table S2. **Primers used in this study (Continued)**

| <b>Construct</b>    | <b>Primer</b> | <b>Sequence (5'-3')</b>                    |
|---------------------|---------------|--------------------------------------------|
|                     | TJ010         | CCCGGATCCCCGTCTTTCTTCTCGTAGAC              |
| <b>mk DHFR-3HA</b>  | TJ141         | CACACGGTACCGCCACCATGGTTCGACCATTGAACTGC     |
|                     | TJ010         | CCCGGATCCCCGTCTTTCTTCTCGTAGAC              |
| <b>mk Porin-3HA</b> | TJ148         | CACACGGTACCGCCACCATGGCTTCTCCTCCAGTTTACAGCG |
|                     | TJ150         | CACACGGATCCCCAGCGTGAAGGACAAAGAC            |
| <b>mk VDAC1-3HA</b> | TJ151         | CACACGGTACCGCCACCATGGCTGTGCCACCCACG        |
|                     | TJ153         | CACACGGATCCCCTGCTTGAAATCCAGTCCTAGAC        |
| <b>3HA NatNT2</b>   | TJ205         | CACACAAGCTTTACCCATACGATGTTCTGACTATG        |
|                     | TJ206         | CACACGGATCCCTTCGAGCGTCCAAAACCTTC           |
| <b>pMK632</b>       | TJ203         | GGAGGGTATTCTGGGCCTCCATGTC                  |
|                     | TJ204         | GTATGTGAATGCTGGTCGCTATACTG                 |
| <b>KanMX/HIS3MX</b> | TJ201         | GACATGGAGGCCCAGAATACCCTCC                  |
|                     | TJ202         | CAGTATAGCGACCAGCATTACATAC                  |

Table S3. Plasmids used in this study

| Plasmid                                | Insert                                                                                                                                     | Reference                   |
|----------------------------------------|--------------------------------------------------------------------------------------------------------------------------------------------|-----------------------------|
| pGEM4polyA                             | Poly-A stretch (72 × A)                                                                                                                    | This study                  |
| pRS316-Atg32-3HAn                      | Atg32 with internal 3 × HA-tag                                                                                                             | Okamoto et al. (2009)       |
| pGEM4polyA-3HA                         | C-terminal 3 × HA-tag                                                                                                                      | This study                  |
| pRS426-TPI-3HA                         | C-terminal 3 × HA-tag                                                                                                                      | This study                  |
| pGEM4-pSu9-DHFR                        | Presequence of <i>N. crassa</i> ATP synthase subunit 9 (aa M1-S69)- <i>M. musculus</i> DHFR                                                | Pfanner et al. (1987)       |
| pGEM4-Tom40                            | Tom40                                                                                                                                      | Paschen et al. (2003)       |
| pGEM4-Tob55                            | Tob55                                                                                                                                      | Paschen et al. (2003)       |
| pGEM4-NcTom40                          | <i>N. crassa</i> Tom40                                                                                                                     | Rapaport and Neupert (1999) |
| pGEM4-VDAC1                            | <i>H. sapiens</i> VDAC1                                                                                                                    | Engl et al. (2012)          |
| pGEM4-hTom40                           | <i>H. sapiens</i> Tom40                                                                                                                    | Engl et al. (2012)          |
| pGEM4polyA-DHFR-3HA                    | <i>M. musculus</i> DHFR-3 × HA-tag                                                                                                         | This study                  |
| pGEM4polyA-yk-DHFR-3HA                 | Yeast kozak sequence (AAAAAAATGTCT) <i>M. musculus</i> DHFR-3 × HA-tag                                                                     | This study                  |
| pGEM4polyA-yk-Porin-3HA                | Yeast kozak sequence (AAAAAAATGTCT) Porin-3 × HA-tag                                                                                       | This study                  |
| pGEM4polyA-yk-Tom40-3HA                | Yeast kozak sequence (AAAAAAATGTCT) Tom40-3 × HA-tag                                                                                       | This study                  |
| pGEM4polyA-yk-Tob55(Δ1-120)-3HA        | Yeast kozak sequence (AAAAAAATGTCT) Tob55 β-barrel domain (aa K121-end)-3 × HA-tag                                                         | This study                  |
| pGEM4polyA-yk-NcTom40                  | Yeast kozak sequence (AAAAAAATGGCT) <i>N. crassa</i> Tom40                                                                                 | This study                  |
| pGEM4polyA-yk-Tom40                    | Yeast kozak sequence (AAAAAAATGTCT) Tom40                                                                                                  | This study                  |
| pGEM4polyA-yk-pSu9-DHFR-3HA            | Yeast kozak sequence (AAAAAAATGTCT) presequence of <i>N. crassa</i> ATP synthase subunit 9 (aa M1-S69)- <i>M. musculus</i> DHFR-3 × HA-tag | This study                  |
| pGEM4polyA-yk-Om14-3HA                 | Yeast kozak sequence (AAAAAAATG) Om14-3HA                                                                                                  | This study                  |
| pGEM4polyA-yk-Cyc3-3HA                 | Yeast kozak sequence (AAAAAAATG) Cyc3-3HA                                                                                                  | This study                  |
| pGEM4polyA-yk-Tim23-3HA                | Yeast kozak sequence (AAAAAAATG) Tim23-3HA                                                                                                 | This study                  |
| pGEM4polyA-yk-Yah1-3HA                 | Yeast kozak sequence (AAAAAAATG) Yah1-3HA                                                                                                  | This study                  |
| pBpa2-PGK1+3SUP4-tRNA <sub>CUA</sub>   | tRNA aaRS + tRNA <sub>CUA</sub>                                                                                                            | Chen et al. (2007)          |
| pRS426-TPI-hp18(VDAC)-DHFR-3HA         | Hairpin 18 of <i>H. sapiens</i> VDAC1 (aa K252-A283)- <i>M. musculus</i> DHFR-3 × HA-tag                                                   | This study                  |
| pRS426-TPI-hp18(VDAC, Bpa258)-DHFR-3HA | Hairpin 18 of <i>H. sapiens</i> VDAC1 (aa K252-A283; Thr258Bpa)- <i>M. musculus</i> DHFR-3 × HA-tag                                        | This study                  |
| pGEM4polyA-mk-DHFR-3HA                 | Mammalian kozak sequence (GCCACCATGG) <i>M. musculus</i> DHFR-3 × HA-tag                                                                   | This study                  |
| pGEM4polyA-mk-Porin-3HA                | Mammalian kozak sequence (GCCACCATGG) Porin-3 × HA-tag                                                                                     | This study                  |
| pGEM4polyA-mk-VDAC1-3HA                | Mammalian kozak sequence (GCCACCATGG) <i>H. sapiens</i> VDAC1-3 × HA-tag                                                                   | This study                  |
| pGEM4-Porin                            | Porin                                                                                                                                      | Mayer et al. (1993)         |
| pFA6a-NatNT2                           | NatNT2 cassette                                                                                                                            | Janke et al. (2004)         |
| pFA6a-KanMX4                           | KanMX4 cassette                                                                                                                            | Wach et al. (1994)          |
| pFA6a-HIS3MX6                          | HIS3MX6 cassette                                                                                                                           | Wach et al. (1997)          |
| pFA6a-3HA-NatNT2                       | 3 × HA-tag CYC1 terminator NatNT2 cassette                                                                                                 | This study                  |
| pMK632                                 | NatMX cassette tetO <sub>7</sub> -CYC1 promoter-Ubiquitin-Leucin-HA-tag                                                                    | Gnanasundram and Koš (2015) |
| pMK632Kan                              | KanMX cassette tetO <sub>7</sub> -CYC1 promoter-Ubiquitin-Leucin-HA-tag                                                                    | This study                  |
| pMK632His                              | HIS3MX cassette tetO <sub>7</sub> -CYC1 promoter-Ubiquitin-Leucin-HA-tag                                                                   | This study                  |

If not indicated otherwise, gene sequences are from *S. cerevisiae*



Table S4. **Antibodies used in this study**

| Antibody directed against | Species | Dilution | Identifier          |
|---------------------------|---------|----------|---------------------|
| <b>Aha1</b>               | Rabbit  | 1:2,000  | N/A                 |
| <b>Bmh1</b>               | Rabbit  | 1:1,000  | N/A                 |
| <b>Cct1</b>               | Rabbit  | 1:500    | N/A                 |
| <b>Cox2</b>               | Rabbit  | 1:1,000  | N/A                 |
| <b>Djp1</b>               | Rabbit  | 1:2,000  | N/A                 |
| <b>H. sapiens GAPDH</b>   | Mouse   | 1:1,000  | CSA-335 (Stressgen) |
| <b>HA</b>                 | Rat     | 1:1,000  | 11867423001 (Roche) |
| <b>Hch1</b>               | Rabbit  | 1:4,000  | N/A                 |
| <b>H. sapiens Hsc70</b>   | Rat     | 1:1,000  | ADI-SPA-815 (Enzo)  |
| <b>Hsp104</b>             | Rabbit  | 1:25,000 | N/A                 |
| <b>Hsp26</b>              | Rabbit  | 1:4,000  | N/A                 |
| <b>Hsp42</b>              | Rabbit  | 1:4,000  | N/A                 |
| <b>Hsp82/Hspc82</b>       | Rabbit  | 1:20,000 | N/A                 |
| <b>Porin</b>              | Rabbit  | 1:50,000 | N/A                 |
| <b>Rps3</b>               | Rabbit  | 1:50,000 | N/A                 |
| <b>Sba1</b>               | Rabbit  | 1:2,500  | N/A                 |
| <b>Sis1</b>               | Rabbit  | 1:20,000 | N/A                 |
| <b>Ssa1/2</b>             | Rabbit  | 1:20,000 | N/A                 |
| <b>Sti1</b>               | Rabbit  | 1:10,000 | N/A                 |
| <b>Tob55</b>              | Rabbit  | 1:2,000  | N/A                 |
| <b>Tom40</b>              | Rabbit  | 1:10,000 | N/A                 |
| <b>Tom70</b>              | Rabbit  | 1:2,000  | N/A                 |
| <b>Ydj1</b>               | Rabbit  | 1:10,000 | N/A                 |

If not indicated otherwise, target proteins are from *S. cerevisiae*.

## References

- Chen, S., P.G. Schultz, and A. Brock. 2007. An improved system for the generation and analysis of mutant proteins containing unnatural amino acids in *Saccharomyces cerevisiae*. *J. Mol. Biol.* 371:112–122. <https://doi.org/10.1016/j.jmb.2007.05.017>
- Engl, G., S. Florian, L. Tranebjærg, and D. Rapaport. 2012. Alterations in expression levels of deafness dystonia protein 1 affect mitochondrial morphology. *Hum. Mol. Genet.* 21:287–299. <https://doi.org/10.1093/hmg/ddr458>
- Gnanasundram, S.V., and M. Koš. 2015. Fast protein-depletion system utilizing tetracycline repressible promoter and N-end rule in yeast. *Mol. Biol. Cell.* 26:762–768. <https://doi.org/10.1091/mbc.e14-07-1186>
- Hoseini, H., S. Pandey, T. Jores, A. Schmitt, M. Franz-Wachtel, B. Macek, J. Buchner, K.S. Dimmer, and D. Rapaport. 2016. The cytosolic cochaperone Sti1 is relevant for mitochondrial biogenesis and morphology. *FEBS J.* 283:3338–3352. <https://doi.org/10.1111/febs.13813>
- Janke, C., M.M. Magiera, N. Rathfelder, C. Taxis, S. Reber, H. Maekawa, A. Moreno-Borchart, G. Doenges, E. Schwob, E. Schiebel, and M. Knop. 2004. A versatile toolbox for PCR-based tagging of yeast genes: new fluorescent proteins, more markers and promoter substitution cassettes. *Yeast.* 21:947–962. <https://doi.org/10.1002/yea.1142>
- Mayer, A., R. Lill, and W. Neupert. 1993. Translocation and insertion of precursor proteins into isolated outer membranes of mitochondria. *J. Cell Biol.* 121:1233–1243. <https://doi.org/10.1083/jcb.121.6.1233>
- Okamoto, K., N. Kondo-Okamoto, and Y. Ohsumi. 2009. Mitochondria-anchored receptor Atg32 mediates degradation of mitochondria via selective autophagy. *Dev. Cell.* 17:87–97. <https://doi.org/10.1016/j.devcel.2009.06.013>
- Paschen, S.A., T. Waizenegger, T. Stan, M. Preuss, M. Cyrklaff, K. Hell, D. Rapaport, and W. Neupert. 2003. Evolutionary conservation of biogenesis of  $\beta$ -barrel membrane proteins. *Nature.* 426:862–866. <https://doi.org/10.1038/nature02208>
- Pfanner, N., H.K. Müller, M.A. Harmey, and W. Neupert. 1987. Mitochondrial protein import: involvement of the mature part of a cleavable precursor protein in the binding to receptor sites. *EMBO J.* 6:3449–3454.
- Rapaport, D., and W. Neupert. 1999. Biogenesis of Tom40, core component of the TOM complex of mitochondria. *J. Cell Biol.* 146:321–331. <https://doi.org/10.1083/jcb.146.2.321>
- Wach, A., A. Brachat, R. Pöhlmann, and P. Philippsen. 1994. New heterologous modules for classical or PCR-based gene disruptions in *Saccharomyces cerevisiae*. *Yeast.* 10:1793–1808. <https://doi.org/10.1002/yea.320101310>
- Wach, A., A. Brachat, C. Alberti-Segui, C. Rebischung, and P. Philippsen. 1997. Heterologous HIS3 marker and GFP reporter modules for PCR-targeting in *Saccharomyces cerevisiae*. *Yeast.* 13:1065–1075. [https://doi.org/10.1002/\(SICI\)1097-0061\(19970915\)13:11%3C1065::AID-YEA159%3E3.O.CO;2-K](https://doi.org/10.1002/(SICI)1097-0061(19970915)13:11%3C1065::AID-YEA159%3E3.O.CO;2-K)
